# Supplementary material for: Bone marrow mesenchymal stem cells combined with ultra-purified alginate gel as a regenerative therapeutic strategy after discectomy for degenerated intervertebral discs
Source: PubMed Central journal article supplement — eBioMedicine. 2020 Mar 4;53:102698. doi: 10.1016/j.ebiom.2020.102698 (PMC7057222; doi:10.1016/j.ebiom.2020.102698), 2020-03-04
Supplement: mmc1.pdf [file mmc1.pdf]

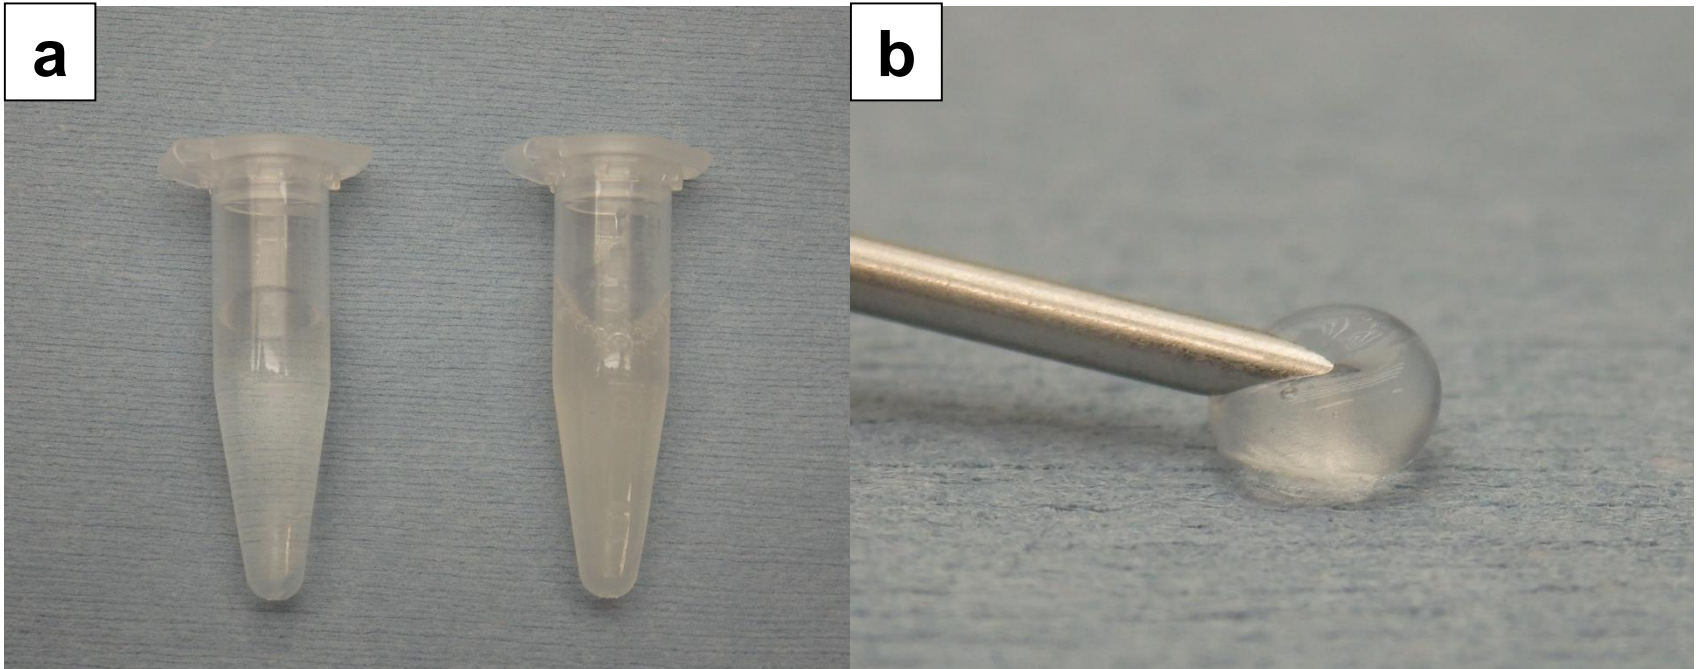

**Supplementary Fig. 1.** Preparation of ultra-purified alginate (UPAL) solution and gelation. (a): Preparation of 2% (w/v) UPAL solution (left side). Labeled bone-derived mesenchymal stem cells (BMSCs) and unlabeled nucleus pulposus cells (NPCs) were encapsulated in the UPAL solution (right side). (b): UPAL gel beads after pipetting into 102 mM CaCl<sub>2</sub> using a 22-gauge needle for gelation.

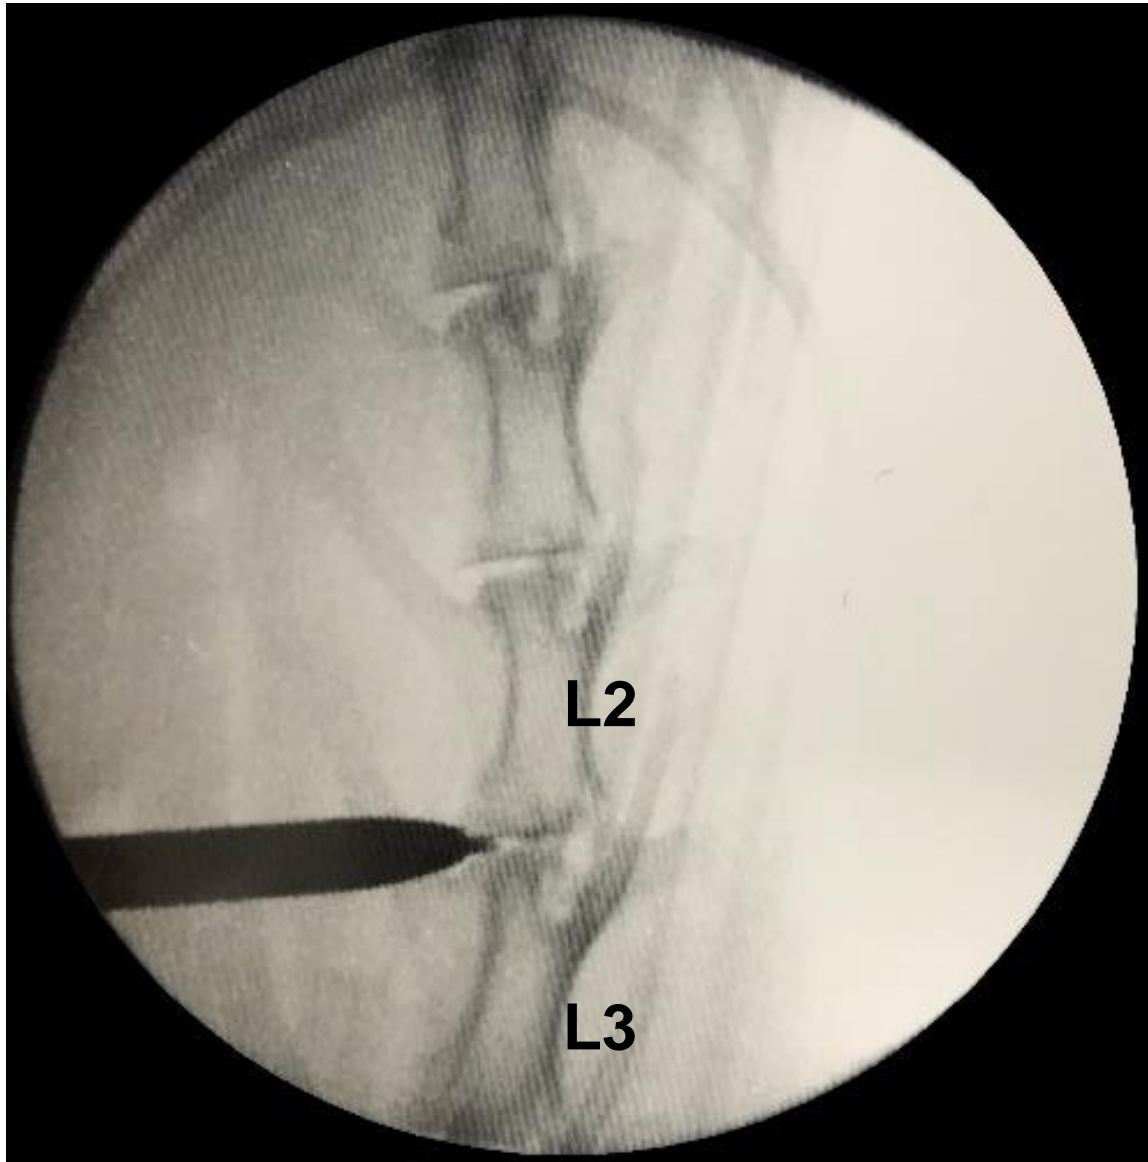

**Supplementary Fig. 2.** Induction of intervertebral disc (IVD) degeneration. Rabbit IVD (L2/3) was punctured with an 18-gauge needle percutaneously under fluorography guidance with a small skin incision and a precut dilator (METRx; Medtronic Sofamor Danek, Memphis, TN).

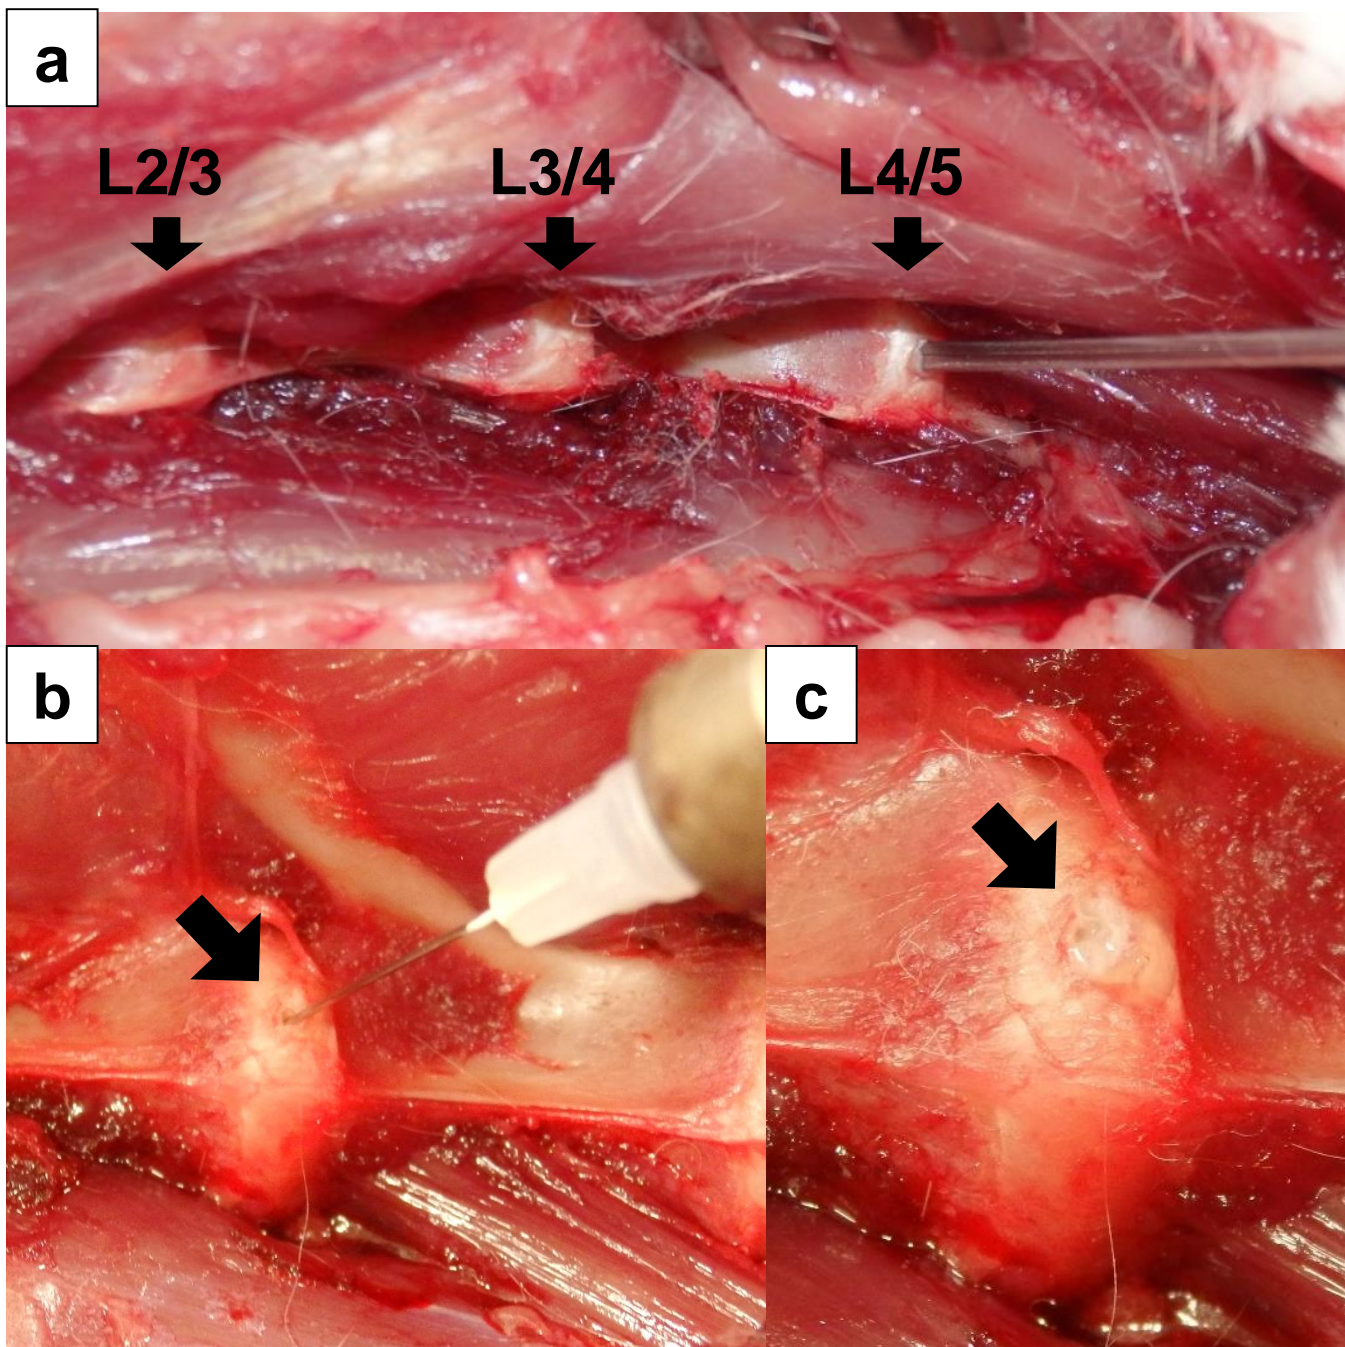

**Supplementary Fig. 3.** In vivo implantation in rabbit. (a): Rabbit intervertebral discs (IVDs) from L2/3 to L4/5 shown via an antero-lateral retroperitoneal approach. Removal of the degenerated nucleus pulposus (NP) tissue using a micro ear forceps after making a hole using an 18-gauge needle. (b): Ultra-purified alginate (UPAL) solution injection into the IVD defect after discectomy. (c): Gelation after injection of 102 mM CaCl<sub>2</sub>.



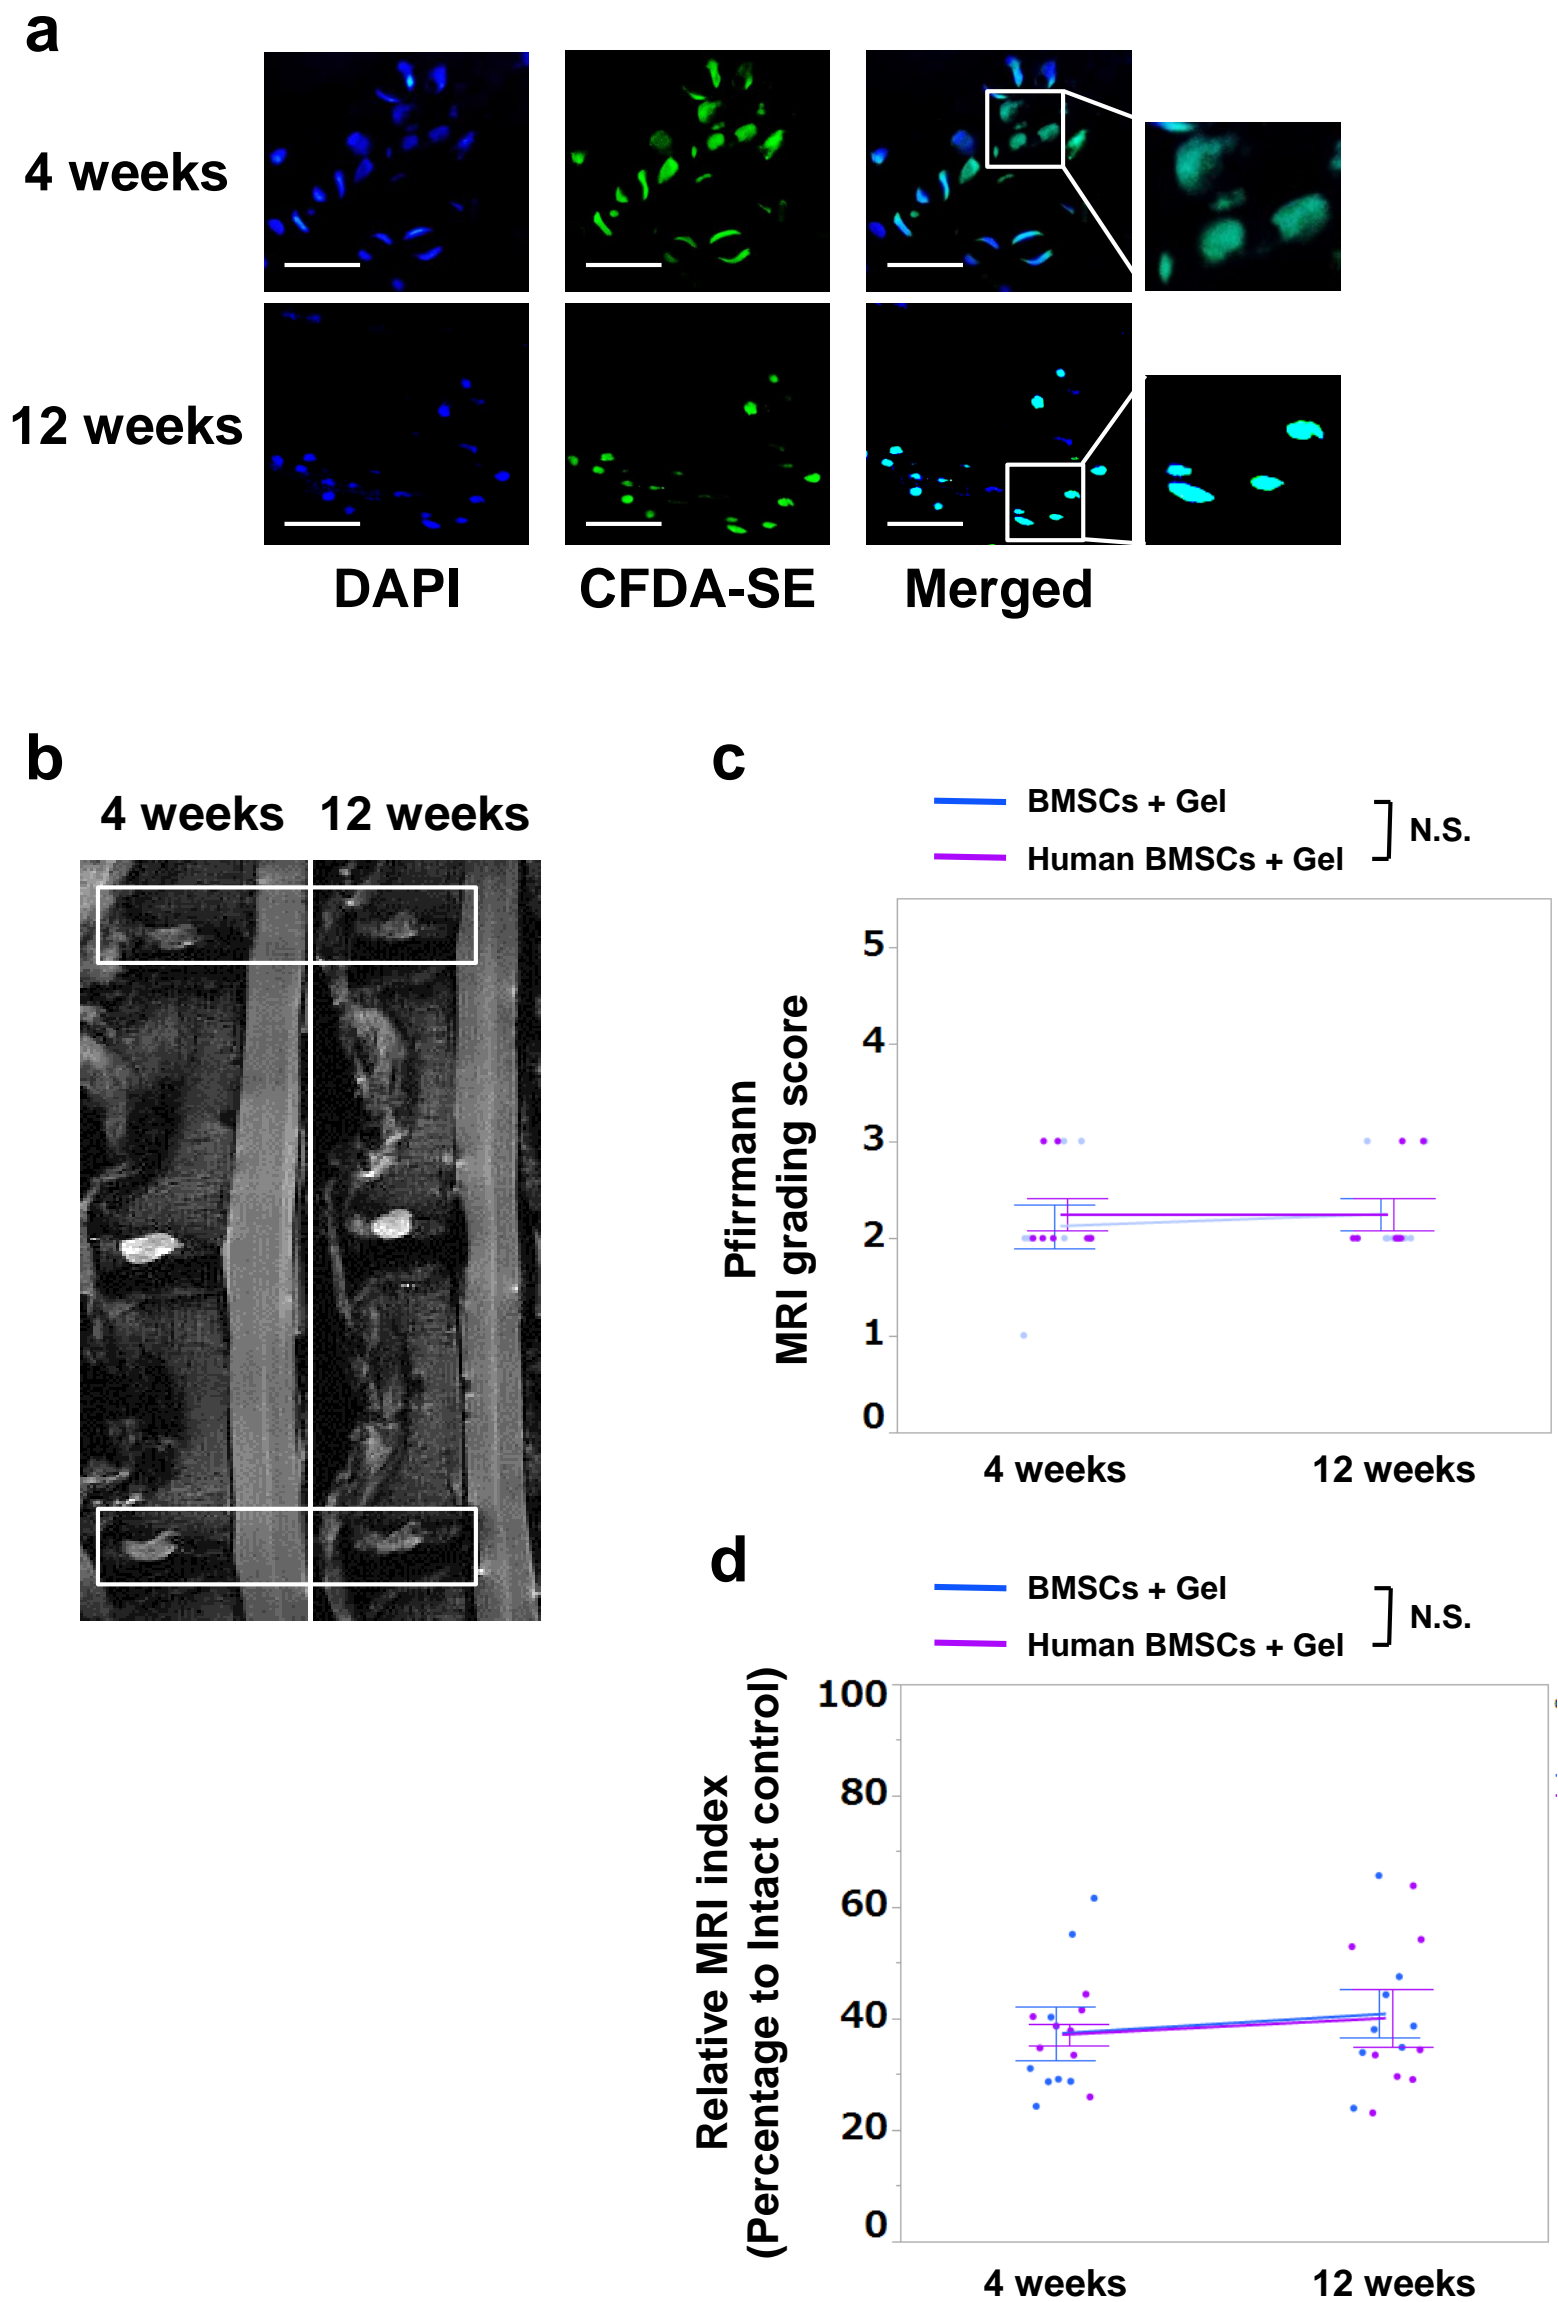

**Supplementary Fig. 4.** Human bone-derived mesenchymal stem cell (BMSC) labeled with carboxyfluorescein diacetate succinimidyl ester (CFDA-SE) implantation in rabbits. (a): Implanted human BMSCs survived in intervertebral discs (IVDs) at 4 and 12 weeks after surgery. Frozen sections of IVD stained by DAPI. Images are representative of four replicates ( $n = 4$ ; 4 and 12 weeks). Scale bar = 50  $\mu\text{m}$ . (b): Human-BMSCs combined with ultra-purified alginate (UPAL) gel preserved the water content of degenerated IVDs following discectomy. T2-weighted, midsagittal images of degenerated IVDs at 4 and 12 weeks after surgery. Images are representative of eight replicates. (c): Pfirrmann grading of IVD degeneration. No significant differences were apparent between rabbit and human BMSCs. Data represent the means  $\pm$  SE (Allogeneic-BMSCs + Gel and Human-BMSCs + Gel  $n = 8$ ; 4 and 12 weeks). N.S., not significant. (d): Magnetic resonance imaging (MRI) index for degenerative alterations of the nucleus pulposus (NP). No significant differences were observed between rabbit and human BMSCs. Data are the means  $\pm$  SE. p-values were determined by one-way ANOVA with post hoc analysis using the Tukey–Kramer test. N.S., not significant.

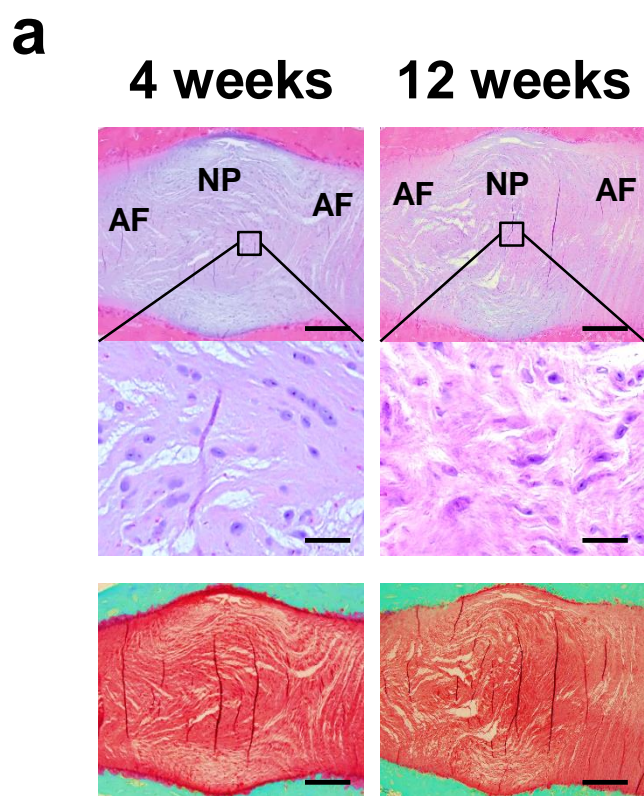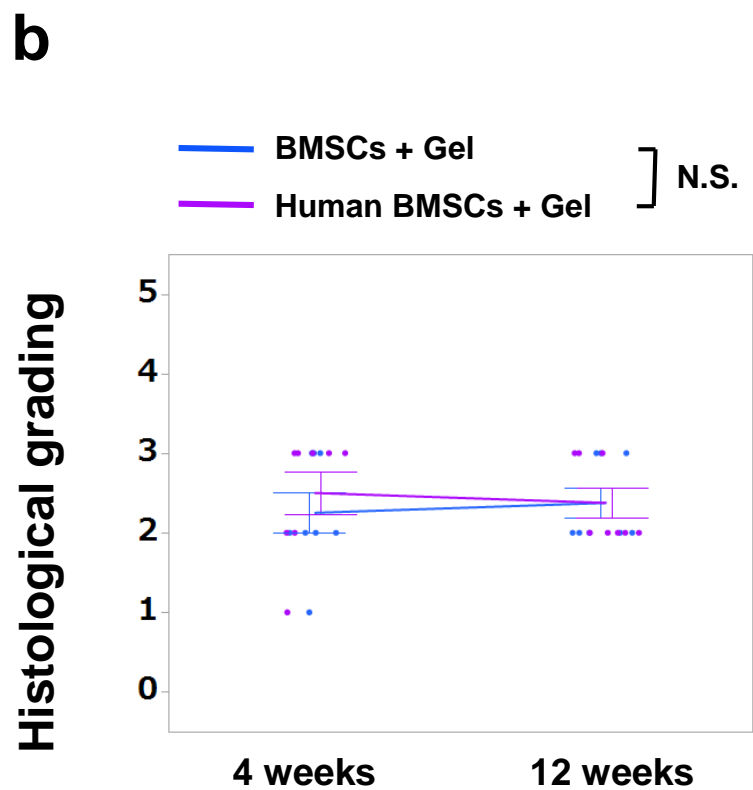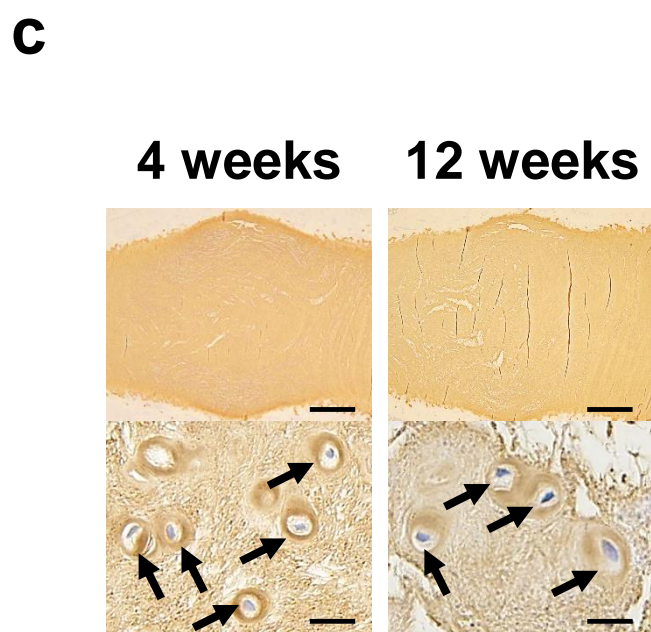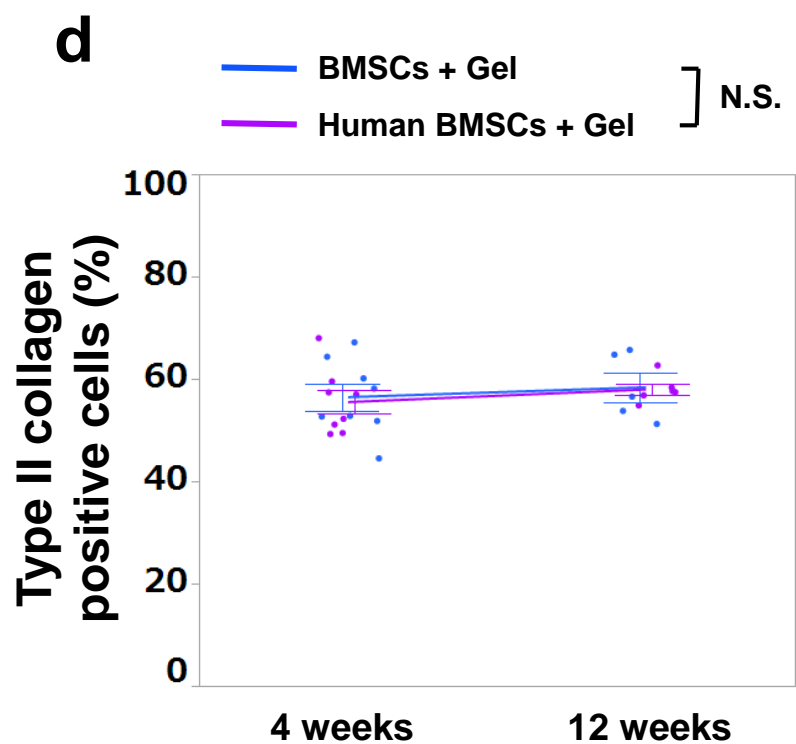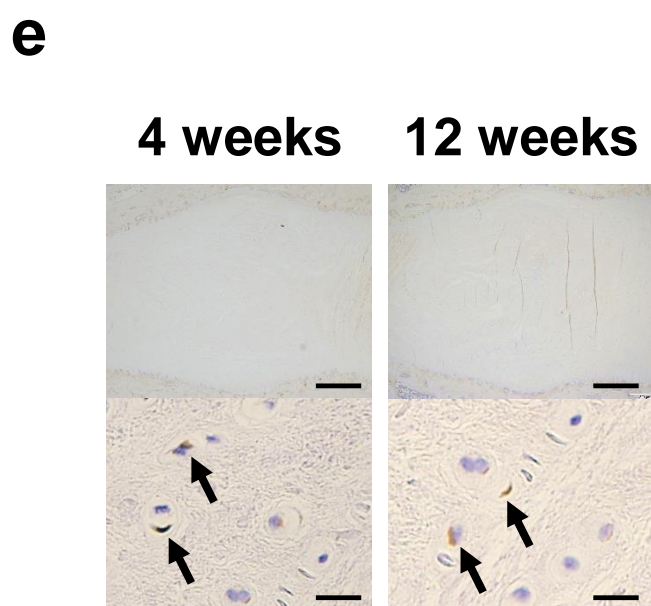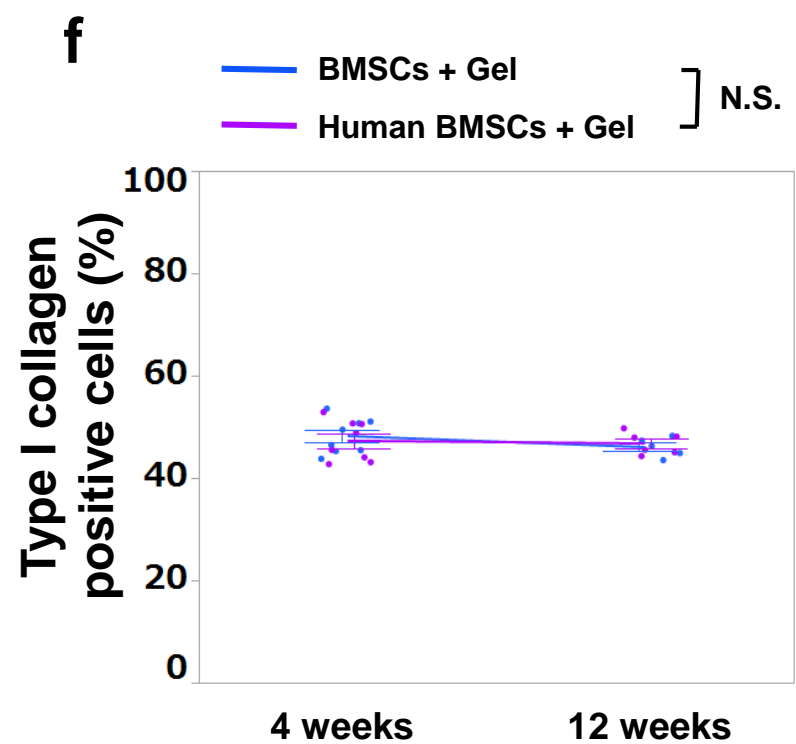

**Supplementary Fig. 5.** Human bone-derived mesenchymal stem cell (BMSC) implantation in rabbits. (a): Midsagittal sections of intervertebral discs (IVDs) stained by hematoxylin and eosin (H&E) and safranin O. Images are representative of eight replicates ( $n = 8$ ; 4 and 12 weeks). AF; annulus fibrosus, NP; nucleus pulposus. Scale bars = 500  $\mu\text{m}$  (first and third sections from the top), 50  $\mu\text{m}$  (second section from the top). (b): Histological grading at 4 and 12 weeks. No significant differences were observed between rabbit and human BMSCs. Data represent the means  $\pm$  SE. p-values were determined by one-way ANOVA with the post hoc Tukey–Kramer test. (c, e): Type II (c) and type I (e) collagen-positive cells in rabbit NPs. Midsagittal sections of rabbit IVDs stained for type II (c) or type I (e) collagen. Images are representative of eight replicates ( $n = 8$ ; 4 and 12 weeks). Arrows indicate cells positive for type II (c) or type I (e) collagen. Scale bars = 500  $\mu\text{m}$  (upper section) and 20  $\mu\text{m}$  (lower section). (d, f): Percentages of type II (d) or type I (f) collagen-positive cells. No significant differences were observed between rabbit and human BMSCs. Data represent the means  $\pm$  SE. p-values were determined by one-way ANOVA with the post hoc Tukey–Kramer test. N.S., not significant.



**a**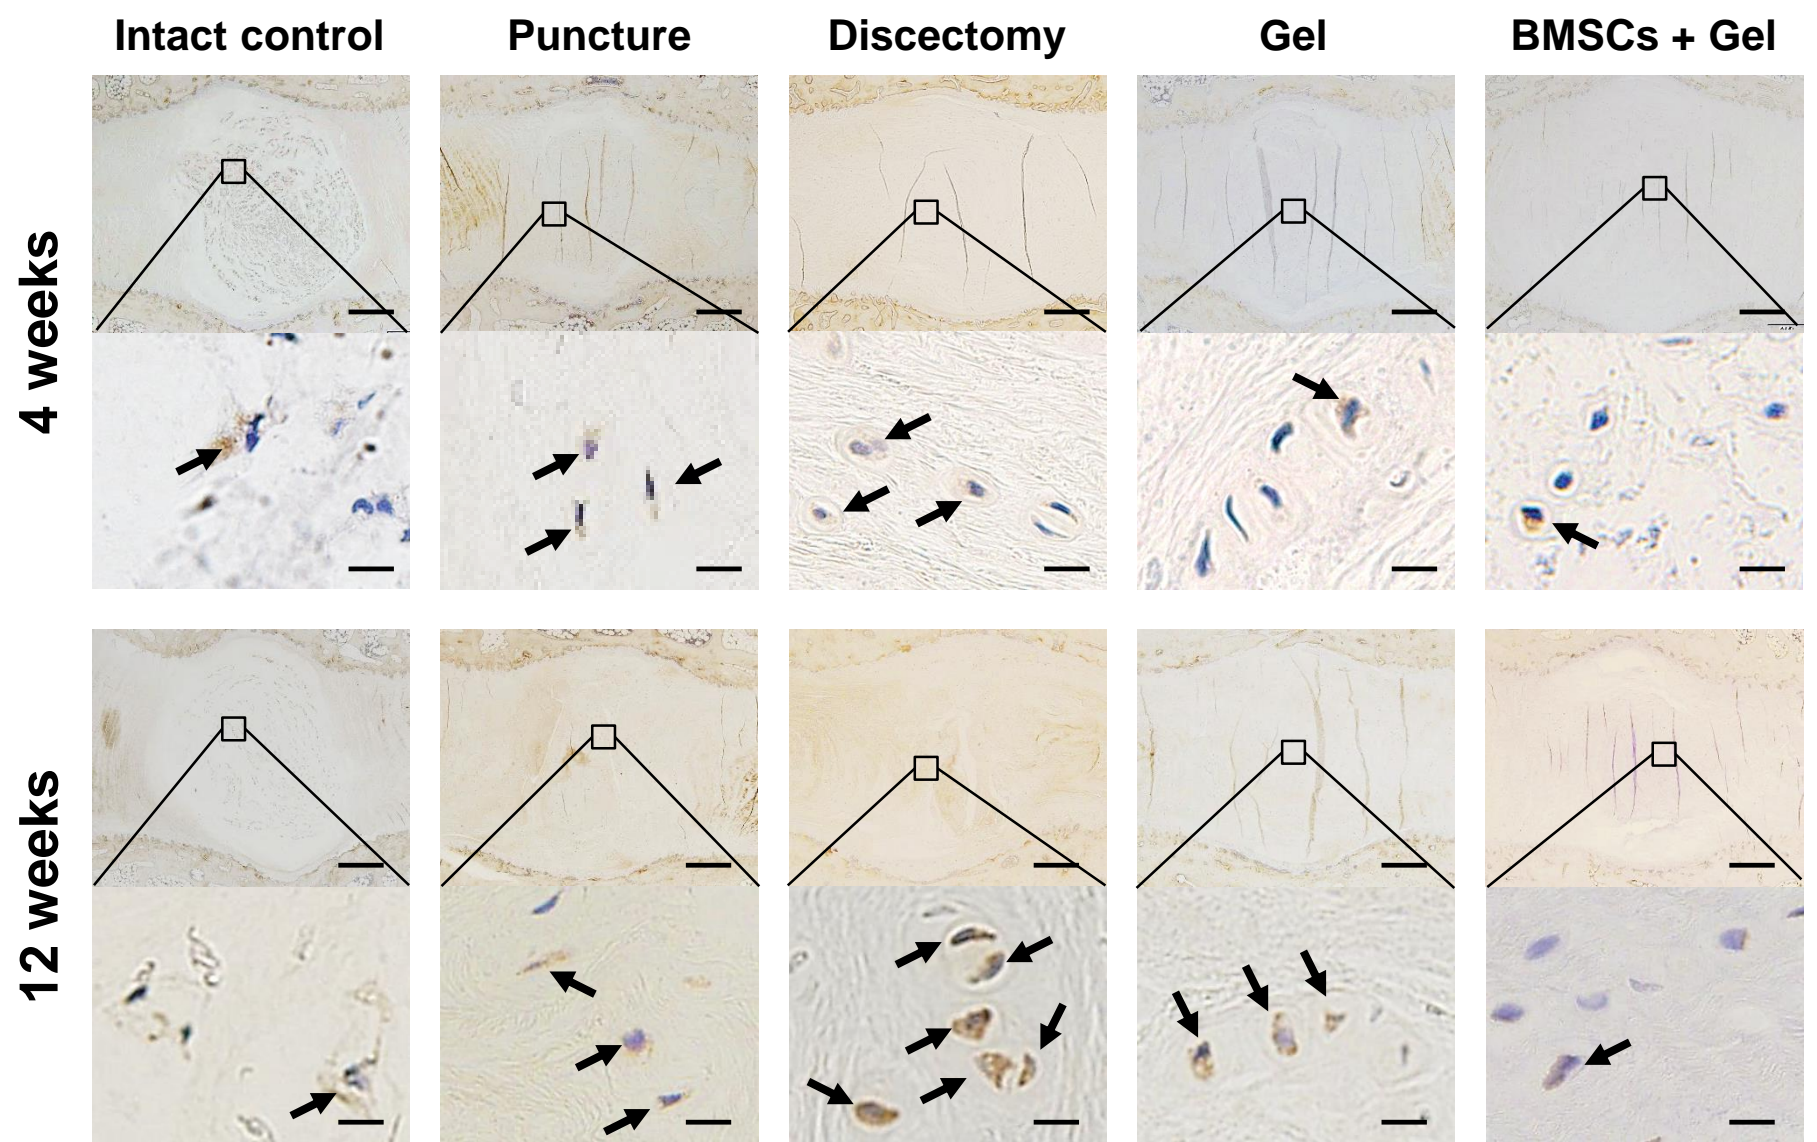**b**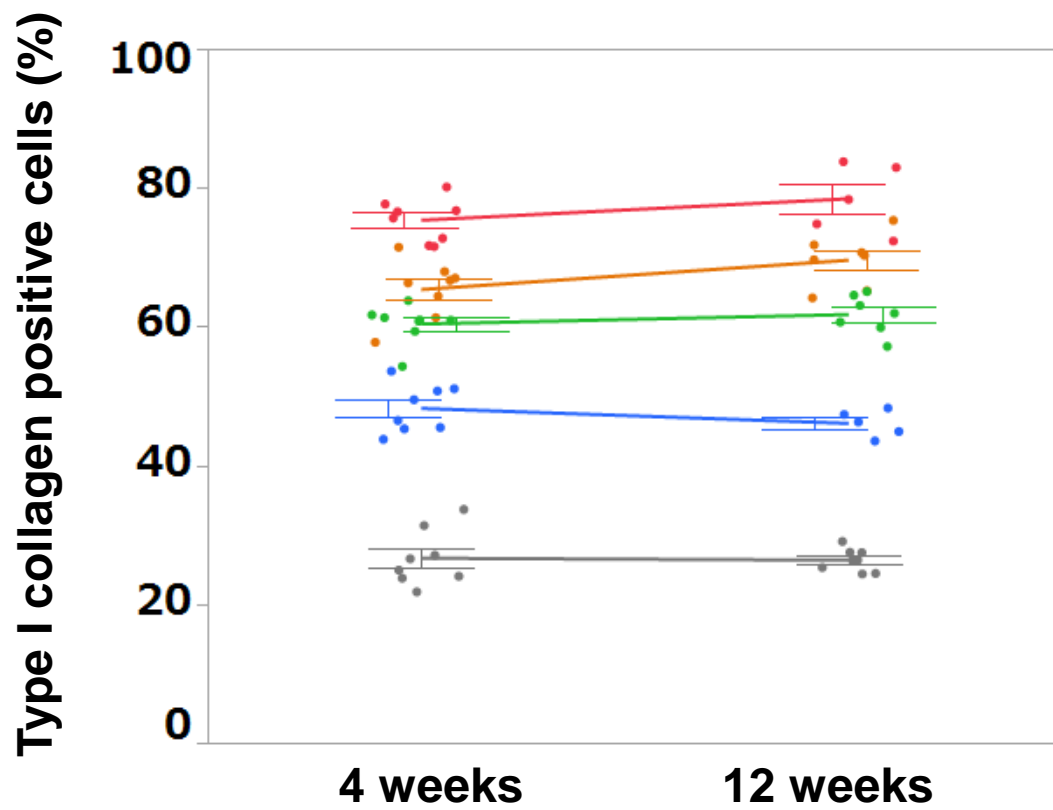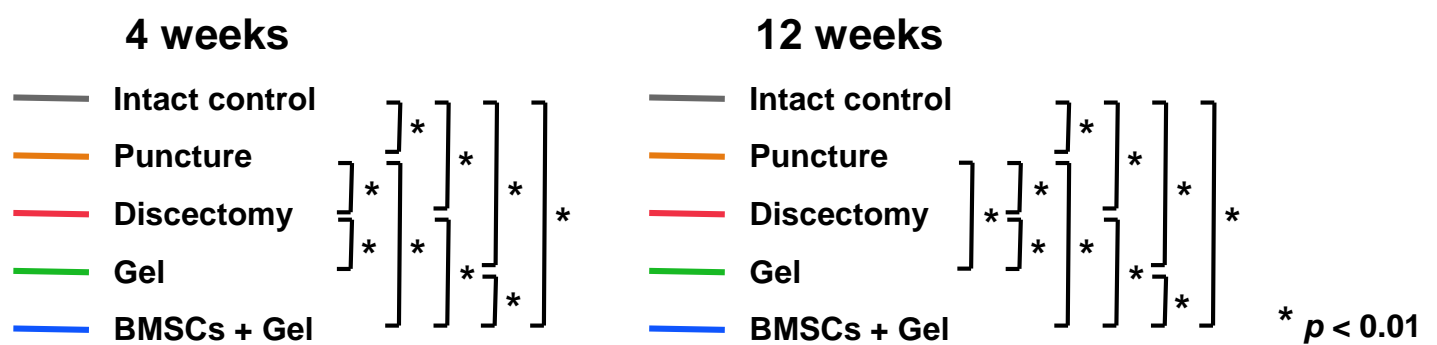

**Supplementary Fig. 6.** Type I collagen-positive cells in rabbit nucleus pulposus (NP). (a) Midsagittal sections of rabbit intervertebral discs (IVDs) stained for type I collagen. Images are representative of eight replicates (Intact control, Puncture, Discectomy, Gel, BMSCs + Gel,  $n = 8$ ; 4 and 12 weeks). Arrows indicate cells positive for type I collagen. Scale bars = 500  $\mu\text{m}$  (first and third sections from the top) and 20  $\mu\text{m}$  (second and fourth sections from the top). (b): Percentages of type I collagen-positive cells. Data represent the means  $\pm$  SE.  $p$ -values were determined by one-way ANOVA with the post hoc Tukey-Kramer test.

**Supplementary Table. 1. Predesigned primer and probe mixes by Applied Biosystems for qRT-PCR**

| Gene             | Gene symbol | Assay ID      |
|------------------|-------------|---------------|
| HIF-1 $\alpha$   | HIF1A       | Oc03398626_m1 |
| GLUT-1           | SLC2A1      | Oc03399482_m1 |
| Brachyury        | T           | Oc03395780_m1 |
| CDMP-1           | GDF5        | Oc00433564_m1 |
| TGF- $\beta$     | TGFB1       | Oc04176122_u1 |
| IGF-1            | IGF1        | Oc04096599_m1 |
| Type II collagen | COL2A1      | Oc03396134_m1 |
| Aggrecan *       | ACAN        | -             |

\* Custom TaqMan © Gene Expression Assay
